# Supplementary material for: Helicity inversion and redox chemistry of chiral manganese(ii) cubanes
Source: Royal Society of Chemistry journal article supplement (doi:10.1039/c4dt01590h), 2014-01-01
Supplement: c4dt01590h1.pdf [file c4dt01590h1.pdf]

## Helicity inversion and redox chemistry of chiral manganese(II) cubanes

Claire Deville,<sup>a</sup> Matteo Granelli,<sup>a</sup> Alan M. Downward,<sup>a</sup> Céline Besnard,<sup>b</sup> Laure Guenée<sup>b</sup> and Alan F. Williams<sup>a,\*</sup>

### Supplementary material.

- Figure S1 UV-visible spectra of compounds **4** and **6**.
- Figure S2 CD spectra of compounds **4** and **6**.
- Figure S3. IR-spectra for Mn<sub>4</sub>(S-**2**-H)<sub>4</sub> cubanes with various capping ligands
- Figure S4 Comparison of [Mn<sub>4</sub>(S-**3**-H)<sub>4</sub>]<sup>4+</sup> cores in **8** (left) and **9** (right).
- Table S1. Bond distances in [Mn<sub>4</sub>(**1**-H)<sub>4</sub>(OH)<sub>2</sub>(MeCN)<sub>2</sub>](ClO<sub>4</sub>)<sub>4</sub>·MeCN(EtOH)<sub>2</sub>, **4**.
- Table S2 Hydrogen Bonds.

Figure S1.

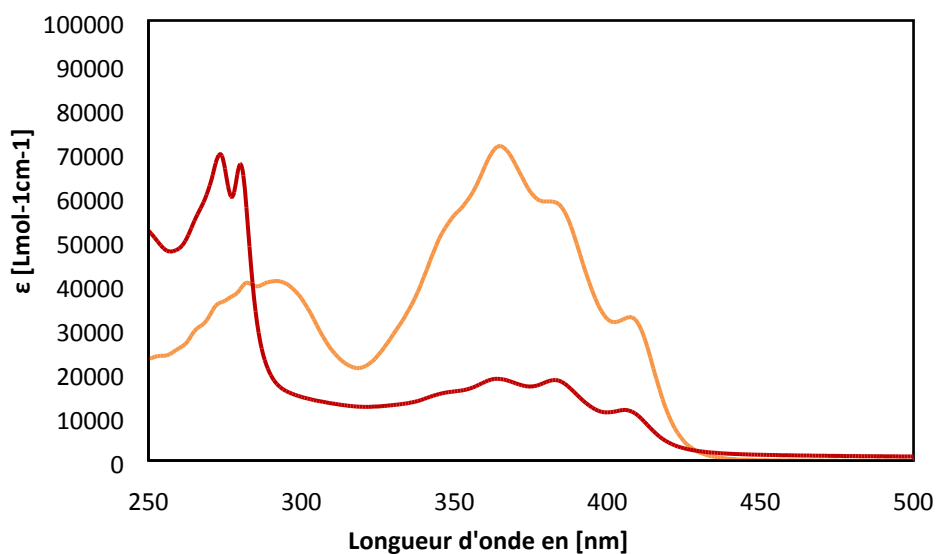

- a) UV-visible spectra of  $[\text{Mn}_4(\mathbf{1-H})_4(\text{OH})_2(\text{MeCN})_2](\text{ClO}_4)_4 \cdot \text{MeCN}(\text{EtOH})_2$ , **4**, brown, and  $[\text{Mn}_4(\mathbf{5-H})_4(\text{DPP})_2](\text{DPP})_2 \cdot 5\text{EtOH}$ , **6**, orange. **4** was measured in MeCN at  $3 \cdot 10^{-5}$  M, **6**  $1 \cdot 10^{-5}$  M in EtOH/ $\text{CH}_2\text{Cl}_2$  50/50.

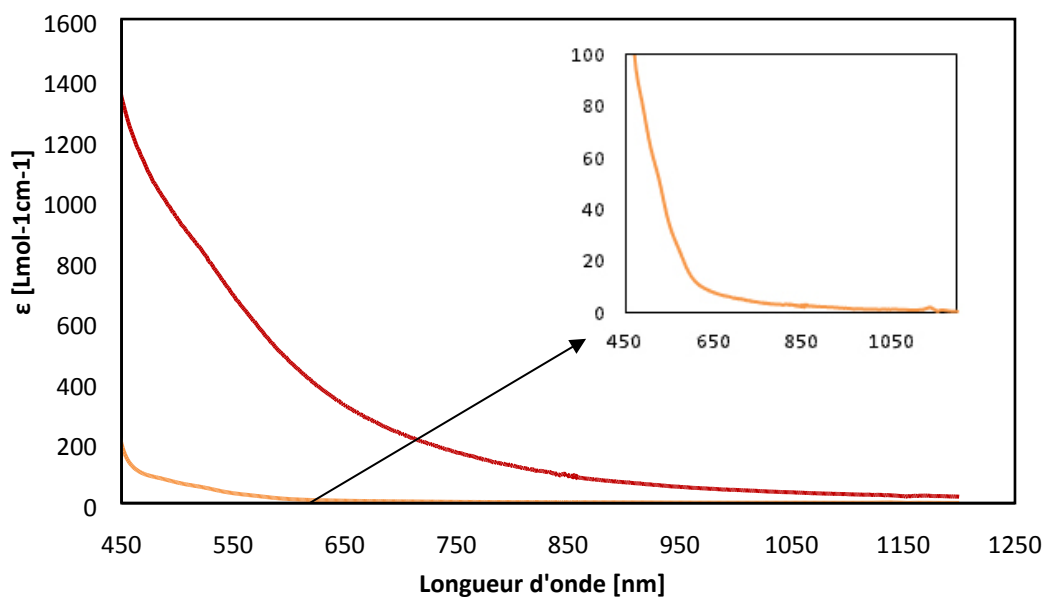

- b) Measurements at higher concentrations: **4** in MeCN at  $3 \cdot 10^{-4}$  M, **6** at  $3 \cdot 10^{-3}$  M in EtOH/ $\text{CH}_2\text{Cl}_2$  50/50.

Figure S2

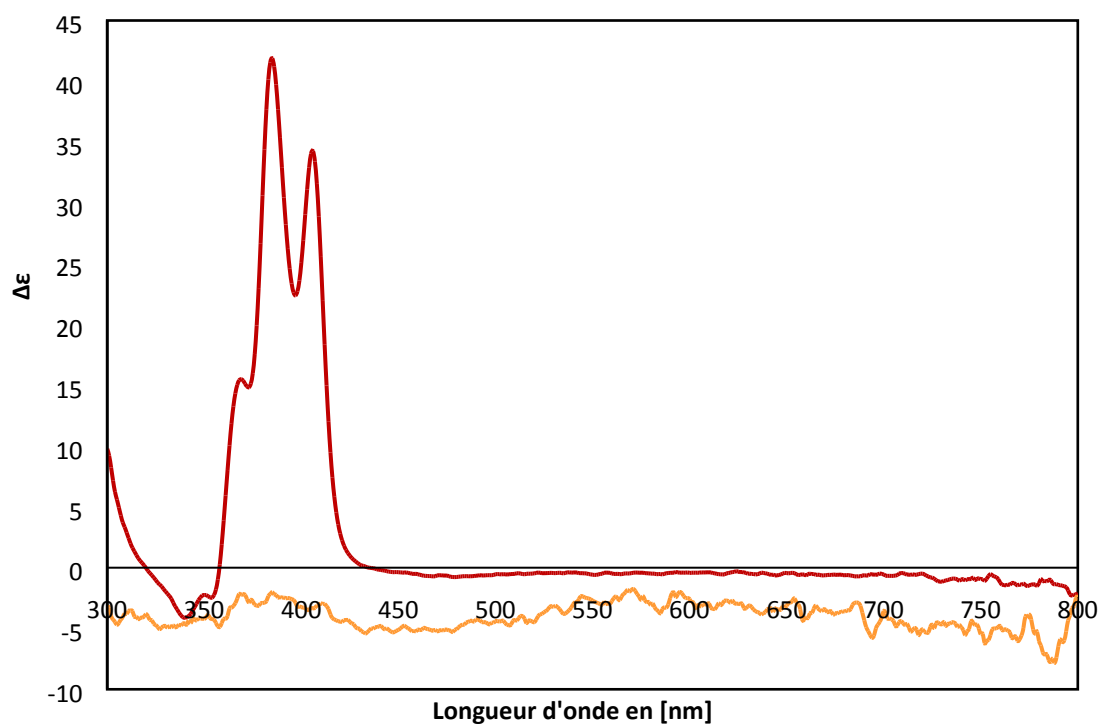

CD spectra of **4** ( $3 \cdot 10^{-5}$  M in MeCN, brown) and **6** ( $1 \cdot 10^{-5}$  M in EtOH/CH<sub>2</sub>Cl<sub>2</sub> 50/50, orange).

Figure S3. IR-spectra for  $\text{Mn}_4(\text{S-2-H})_4$  cubanes with various capping ligands: DPP (green),  $\text{PhCO}_2^-$  (violet),  $m\text{-(NO}_2\text{)C}_6\text{H}_4\text{CO}_2^-$  (blue),  $p\text{-(NO}_2\text{)C}_6\text{H}_4\text{CO}_2^-$  (red).

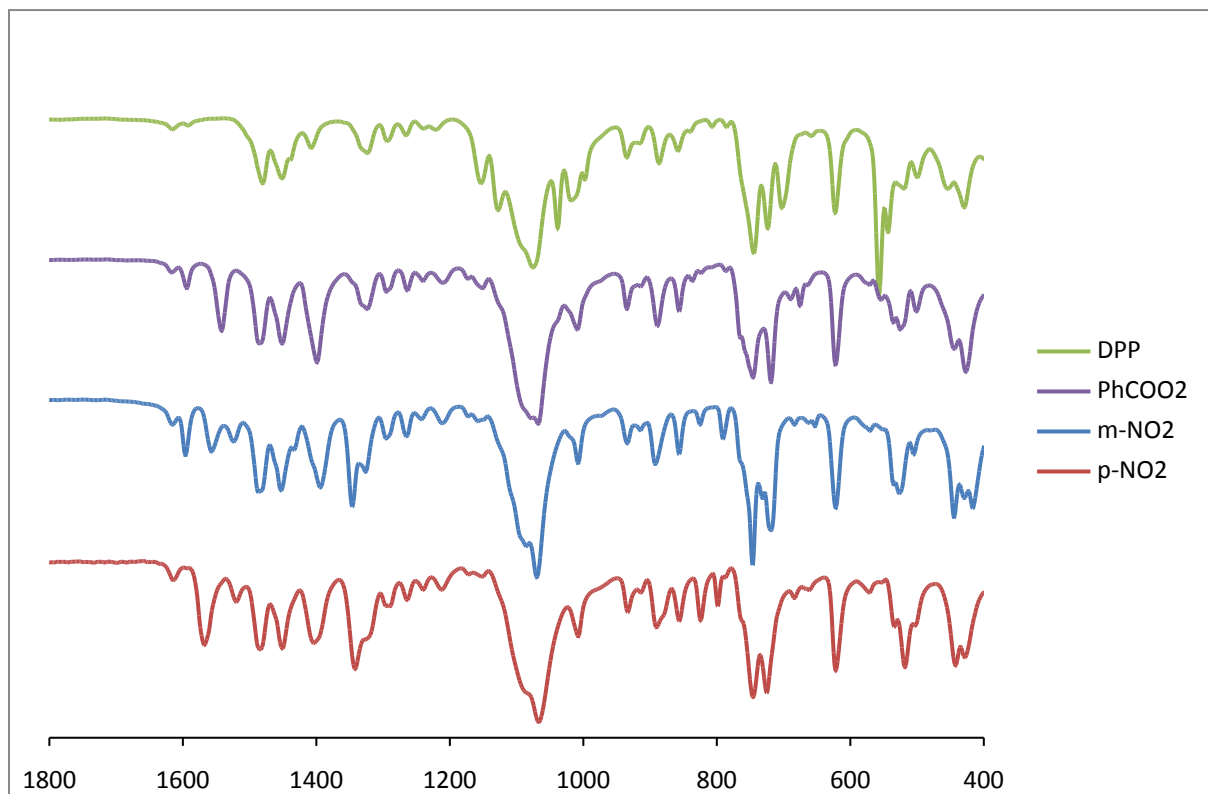

Figure S4 Comparison of  $[\text{Mn}_4(\text{S-3-H})_4]^{4+}$  cores in **8** (left) and **9** (right).

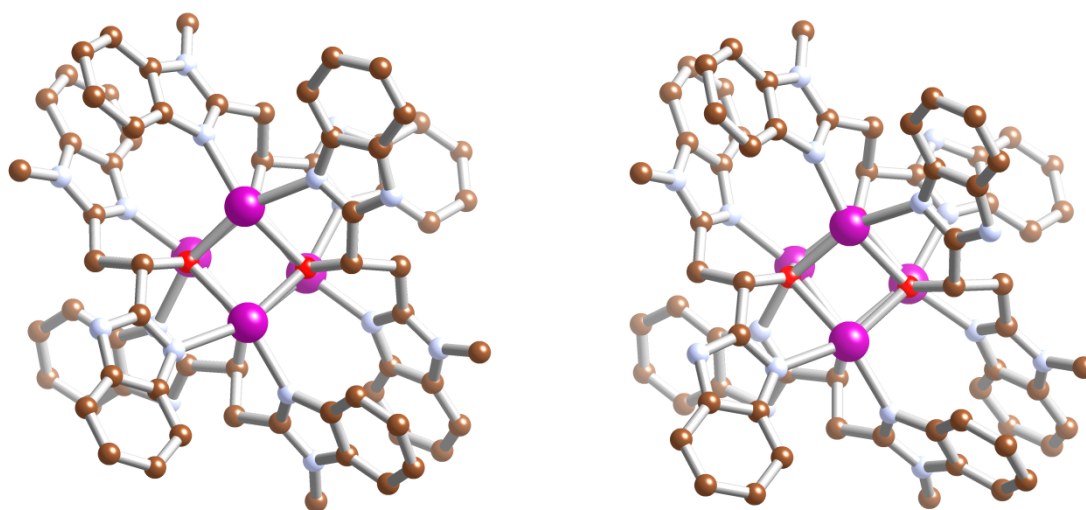

Table S1. Bond distances in  $[\text{Mn}_4(\mathbf{1-H})_4(\text{OH})_2(\text{MeCN})_2](\text{ClO}_4)_4 \cdot \text{MeCN}(\text{EtOH})_2$ , **4**.

| Bond to Mn(III) | Distance, Å | Bond to Mn(II) | Distance, Å |
|-----------------|-------------|----------------|-------------|
| Mn1-O1A         | 1.888(3)    | Mn(3)-O13      | 2.040(4)    |
| Mn1-O1B         | 2.102(4)    | Mn3-N4B        | 2.146(4)    |
| Mn1-N2A         | 2.160(4)    | Mn3-N4A        | 2.152(4)    |
| Mn2-O13         | 1.855(3)    | Mn3-O1A        | 2.177(3)    |
| Mn2-N1B         | 2.101(4)    | Mn3-N1S        | 2.388(5)    |
| Mn2-O1B         | 2.166(4)    | Mn3-O1B        | 2.433(3)    |

Table S2 Hydrogen Bonds.

[Mn<sub>4</sub>(1-H)<sub>4</sub>(OH)<sub>2</sub>(MeCN)<sub>2</sub>](ClO<sub>4</sub>)<sub>4</sub>·MeCN(EtOH)<sub>2</sub>, **4**.

| <i>D</i> —H··· <i>A</i>                               | <i>D</i> —H | H··· <i>A</i> | <i>D</i> ··· <i>A</i> | <i>D</i> —H··· <i>A</i> |
|-------------------------------------------------------|-------------|---------------|-----------------------|-------------------------|
| N1 <i>A</i> —H1 <i>C</i> ···O8 <i>PB</i>              | 0.88        | 2.21          | 2.93 (2)              | 139                     |
| N3 <i>A</i> —H3 <i>C</i> ···O1 <i>S</i> <sup>iv</sup> | 0.88        | 1.89          | 2.731 (6)             | 160                     |
| N2 <i>B</i> —H2 <i>D</i> ···O4 <i>E</i> <sup>v</sup>  | 0.88        | 2.20          | 3.029 (13)            | 157                     |
| N3 <i>B</i> —H3 <i>D</i> ···O2 <i>P</i> <sup>v</sup>  | 0.88        | 2.06          | 2.909 (6)             | 161                     |
| O13—H19···O3 <i>D</i> <sup>iv</sup>                   | 0.86        | 2.00          | 2.835 (17)            | 162.3                   |

[Mn<sub>4</sub>(5-H)<sub>4</sub>(DPP)<sub>2</sub>](DPP)<sub>2</sub>·5EtOH, **6**.

| <i>D</i> —H··· <i>A</i>                                  | <i>D</i> —H | H··· <i>A</i> | <i>D</i> ··· <i>A</i> | <i>D</i> —H··· <i>A</i> |
|----------------------------------------------------------|-------------|---------------|-----------------------|-------------------------|
| N21 <i>B</i> —H21 <i>B</i> ···O2 <i>D</i> <sup>ii</sup>  | 0.86        | 1.95          | 2.763 (5)             | 158                     |
| N11 <i>B</i> —H11 <i>B</i> ···O1                         | 0.86        | 1.95          | 2.797 (6)             | 170                     |
| N11 <i>A</i> —H11 <i>A</i> ···O3 <i>D</i> <sup>iii</sup> | 0.86        | 1.89          | 2.739 (5)             | 167                     |
| O1—H1 <i>A</i> ···O2 <i>D</i> <sup>ii</sup>              | 0.82        | 1.91          | 2.732 (5)             | 176                     |

Symmetry codes: (ii)  $-x+3/2, -y+1/2, -z$ ; (iii)  $-x+3/2, y+1/2, -z+1/2$ .[Mn<sub>4</sub>(S-3-H)<sub>4</sub>(DPP)<sub>2</sub>](ClO<sub>4</sub>)<sub>2</sub>, **8**

| <i>D</i> —H··· <i>A</i>          | <i>D</i> —H | H··· <i>A</i> | <i>D</i> ··· <i>A</i> | <i>D</i> —H··· <i>A</i> |
|----------------------------------|-------------|---------------|-----------------------|-------------------------|
| N11 <i>A</i> —H11 <i>A</i> ···O4 | 0.86        | 2.21          | 3.062 (5)             | 170                     |
| N11 <i>B</i> —H11 <i>B</i> ···O5 | 0.91        | 2.30          | 3.026 (5)             | 137                     |

[Mn<sub>4</sub>(S-3-H)<sub>4</sub>(m-C<sub>6</sub>H<sub>4</sub>(NO<sub>2</sub>)CO<sub>2</sub>)<sub>2</sub>](ClO<sub>4</sub>)<sub>2</sub>, **9**

| <i>D</i> —H··· <i>A</i>          | <i>D</i> —H | H··· <i>A</i> | <i>D</i> ··· <i>A</i> | <i>D</i> —H··· <i>A</i> |
|----------------------------------|-------------|---------------|-----------------------|-------------------------|
| N11 <i>A</i> —H11 <i>A</i> ···O7 | 0.84 (3)    | 2.25 (4)      | 3.074 (6)             | 168 (5)                 |
| N11 <i>B</i> —H11 <i>B</i> ···O1 | 0.85 (3)    | 2.13 (4)      | 2.894 (6)             | 148 (5)                 |
| N11 <i>C</i> —H11 <i>C</i> ···O3 | 0.85 (3)    | 2.25 (4)      | 3.092 (6)             | 170 (5)                 |
| N11 <i>D</i> —H11 <i>D</i> ···O5 | 0.85 (3)    | 2.11 (4)      | 2.851 (6)             | 145 (5)                 |

Symmetry codes: (iv)  $x-1/2, y+1/2, z$ ; (v)  $x-1/2, y+1/2, z+1$ .
